# Supplementary material for: Would Customers Pay to Go Green: The Impact of Green Innovation on Corporate Value in Chinese Context
Source: Research Square preprint supplement (doi:10.21203/rs.3.rs-7308220/v1), 2025-10-07
Supplement: Supplementary file 1 [file a69adee72616f3b33804a827.docx]

**Supplementary document**

***Would Customers Pay to Go Green: The Impact of Green Innovation on Corporate Value in Chinese Context***

This document provides supplemental information to the main discussions and analyses in the manuscript entitled “*Would Customers Pay to Go Green: The Impact of Green Innovation on Corporate Value in Chinese Context*”. We label the tables in this document starting with “S” (e.g., Table S1) to avoid confusion with the tables presented in the main document.

Table S1 in the supplementary document present the baseline results using the alternative proxy for green innovation (*Green1*), which is calculated by the natural logarithm of one plus the number of green innovation patents and green utility model patents obtained in the focal year *jointly*. Specifically, Column (1) presents the results without the core explanatory variable, and it shows that corporate green income (*GRev*) is significantly related with the control variables. We test the main hypothesis in Column (2). The coefficient of *Green1* is significantly positive at the level of 1%, which supports our hypothesis H1a that green innovation positively impacts on green revenue implication of corporate value. The results are consistent with the conclusion in main context of the submitted manuscript.

Further, the coefficient of the interaction term of marketing capability (*MC*) and green innovation (*Green1*) in Column (3) in is significantly positive at 1% level, with t-statistics being 7.52. This supports the hypothesis H2a.

**Table S1 Green Innovation (*Green1*), Marketing Capability and Corporate Value**

|  | ***GRev*** | | | |
| --- | --- | --- | --- | --- |
|  | **(1)** | **(2)** | **(3)** | **(4)** |
| *Intercept* | 0.426*** | 0.569*** | -3.912*** | -3.837*** |
|  | (9.21) | (12.05) | (-10.71) | (-10.56) |
| *Green1* |  | 0.042*** | 0.042*** | -1.751*** |
|  |  | (9.59) | (9.49) | (-7.39) |
| *Green1×MC* |  |  |  | 0.044*** |
|  |  |  |  | (7.52) |
| *MC* |  |  | 0.090*** | 0.085*** |
|  |  |  | (12.30) | (11.83) |
| *Size* | -0.003 | -0.011*** | 0.021*** | 0.026*** |
|  | (-1.63) | (-5.84) | (6.66) | (8.28) |
| *Lev* | 0.106*** | 0.129*** | 0.082*** | 0.068*** |
|  | (4.11) | (4.97) | (3.21) | (2.67) |
| *R&D* | 0.073 | <0.001 | -0.255*** | -0.282*** |
|  | (0.92) | (-0.01) | (-3.03) | (-3.34) |
| *Growth* | 0.002* | 0.002* | 0.002* | 0.002** |
|  | (1.89) | (1.73) | (1.82) | (2.00) |
| *ROA* | -0.192*** | -0.178*** | -0.100*** | -0.097*** |
|  | (-6.92) | (-6.40) | (-3.69) | (-3.57) |
| *Age* | -0.006 | <0.001 | 0.001 | -0.006 |
|  | (-0.92) | (0.02) | (0.10) | (-0.87) |
| *SOE* | -0.015*** | -0.017*** | -0.011*** | -0.010*** |
|  | (-4.45) | (-5.04) | (-3.36) | (-2.84) |
| *Share* | 0.004 | 0.004 | 0.017 | 0.019* |
|  | (0.37) | (0.35) | (1.59) | (1.76) |
| *Ana* | 0.016*** | 0.017*** | 0.017*** | 0.015*** |
|  | (9.40) | (9.51) | (9.69) | (8.76) |
| *Year* | YES | YES | YES | YES |
| *Ind* | YES | YES | YES | YES |
| *R2* | 11.30% | 12.61% | 13.68% | 14.32% |
| *Adj R2* | 11.13% | 12.42% | 13.49% | 14.13% |
| *N* | 13356 | 13356 | 13356 | 13356 |
| *F-value* | 35.541*** | 35.908*** | 37.148*** | 37.025*** |

Note: The t-statistics in parentheses are calculated using robust standard errors clustered at firm-level. ***, ** and * indicate that the coefficient is significant at the 1%, 5% and 10% levels, respectively.

To address the potential measurement error, we use the dummy variable of green innovation (*Green1_dum*) as the independent variable for regression. Columns (2) of Table S2 shows that *Green1_dum* is significantly positively associated with the green income (*GRev*) at the 1% significance level.

**Table S2 Green Innovation (*Green_dum*), Marketing Capability and Corporate Value**

|  | ***GRev*** | |
| --- | --- | --- |
|  | **(1)** | **(2)** |
| *Intercept* | 0.426*** | 0.531*** |
|  | (9.21) | (11.37) |
| *Green1_dum* |  | 0.053*** |
|  |  | (9.45) |
| *Size* | -0.003 | -0.009*** |
|  | (-1.63) | (-4.69) |
| *Lev* | 0.106*** | 0.123*** |
|  | (4.11) | (4.77) |
| *R&D* | 0.073 | 0.005 |
|  | (0.92) | (0.06) |
| *Growth* | 0.002* | 0.002* |
|  | (1.89) | (1.86) |
| *ROA* | -0.192*** | -0.177*** |
|  | (-6.92) | (-6.32) |
| *Age* | -0.006 | -0.005 |
|  | (-0.92) | (-0.75) |
| *SOE* | -0.015*** | -0.016*** |
|  | (-4.45) | (-4.70) |
| *Share* | 0.004 | 0.001 |
|  | (0.37) | (0.08) |
| *Ana* | 0.016*** | 0.016*** |
|  | (9.40) | (9.32) |
| *Year* | YES | YES |
| *Ind* | YES | YES |
| *R2* | 11.31% | 12.31% |
| *Adj R2* | 11.13% | 12.12% |
| *N* | 13356 | 13356 |
| *F-value* | 35.541*** | 35.662*** |

Note: The t-statistics in parentheses are calculated using robust standard errors clustered at firm-level. ***, ** and * indicate that the coefficient is significant at the 1%, 5% and 10% levels, respectively.

To mitigate the endogeneity concern, we first regress whether a firm has green income on firm-level control variables. We calculate Inverse Mills Ratio (*lambda*) from first stage and then add it in the second stage. Table S3 shows the results. Column (2) shows that after controlling for endogeneity, the coefficient of *Green1* on *GRev* remains significantly positive. This indicates that previous findings are robust and not affected by the selection-bias problem.

**Table S3 Results of Heckman two-stage model**

|  | **(1)** | **(2)** |
| --- | --- | --- |
|  | ***GRev_dum*** | ***GRev*** |
| *Intercept* | -4.042*** | 2.522*** |
|  | (-6.38) | (3.46) |
| *Green1* |  | 0.023** |
|  |  | (2.26) |
| *lambda* |  | -1.417** |
|  |  | (-2.24) |
| *Size* | 0.069** | -0.050*** |
|  | (2.40) | (-3.94) |
| *Lev* | 1.009*** | -0.209 |
|  | (3.28) | (-0.72) |
| *R&D* | 1.204 | -0.681 |
|  | (1.03) | (-1.42) |
| *Growth* | -0.020 | 0.026*** |
|  | (-1.54) | (5.82) |
| *ROA* | -2.921*** | 0.137 |
|  | (-5.10) | (0.49) |
| *Age* | -0.093 | 0.028 |
|  | (-0.93) | (0.92) |
| *SOE* | -0.495*** | 0.095*** |
|  | (-8.11) | (3.04) |
| *Share* | -0.598*** | 0.296*** |
|  | (-3.22) | (4.83) |
| *Ana* | 0.256*** | <0.001 |
|  | (8.00) | (-0.01) |
| *Year* | YES | YES |
| *Ind* | YES | YES |
| *Pseudo R2* | 8.90% |  |
| *R2* |  | 13.04% |
| *Adj R2* |  | 11.91% |
| *N* | 13356 | 2178 |
| *F-value* |  | 14.767*** |

Note: The t-statistics in parentheses are calculated using robust standard errors clustered at firm-level. ***, ** and * indicate that the coefficient is significant at the 1%, 5% and 10% levels, respectively.

Table S4 presents the 2SLS regression results using *ClimateRisk1* and *ClimateRisk2* as the instrumental variable, respectively. Column (1) and Column (3) of Table S4 report the regression results of the first stage when the dependent variable is *Green1*. The coefficients of *ClimateRisk1* and *ClimateRisk2* are significantly positive (t-statistic = 10.62; 8.96), consistent with the prediction that firms are more active in green innovation if they face higher climate risk.

Column (2) and Column (4) of Table S4 report the regression results of the second stage when the dependent variable is *GRev*. The instrumented *Green1* (*Green1#*) is positively related to green income at the significance level of 1%. Overall, the 2SLS regression results support our main conclusion.

**Table S4 Results of Reverse Causality Tests (IV = *ClimateRisk*)**

|  | **(1)** | **(2)** | **(3)** | **(4)** |
| --- | --- | --- | --- | --- |
|  | ***Green1*** | ***GRev*** | ***Green1*** | ***GRev*** |
| *Intercept* | -3.353*** | 3.388*** | -3.263*** | 3.944*** |
|  | (-21.55) | (23.55) | (-20.57) | (23.05) |
| *Green1#* |  | 0.925*** |  | 1.099*** |
|  |  | (21.35) |  | (20.97) |
| *ClimateRisk1* | 0.455*** |  |  |  |
|  | (10.62) |  |  |  |
| *ClimateRisk2* |  |  | 0.107*** |  |
|  |  |  | (8.96) |  |
| *Size* | 0.183*** | -0.175*** | 0.184*** | -0.208*** |
|  | (27.50) | (-21.08) | (27.39) | (-21.00) |
| *Lev* | -0.560*** | 0.535*** | -0.510*** | 0.616*** |
|  | (-9.43) | (16.07) | (-8.53) | (17.01) |
| *R&D* | 1.876*** | -1.547*** | 1.811*** | -1.848*** |
|  | (8.60) | (-14.41) | (8.28) | (-15.72) |
| *Growth* | 0.005* | -0.002** | 0.005* | -0.003*** |
|  | (1.84) | (-2.03) | (1.88) | (-2.79) |
| *ROA* | -0.282*** | 0.114*** | -0.305*** | 0.172*** |
|  | (-3.79) | (4.14) | (-4.13) | (5.92) |
| *Age* | -0.125*** | 0.108*** | -0.132*** | 0.130*** |
|  | (-6.75) | (12.66) | (-6.98) | (13.88) |
| *SOE* | 0.051*** | -0.052*** | 0.045*** | -0.060*** |
|  | (5.88) | (-12.95) | (5.16) | (-13.69) |
| *Share* | -0.024 | 0.008 | -0.017 | 0.009 |
|  | (-0.77) | (0.79) | (-0.53) | (0.87) |
| *Ana* | -0.003 | 0.017*** | -0.001 | 0.017*** |
|  | (-0.62) | (10.34) | (-0.21) | (10.30) |
| *Year* | YES | YES | YES | YES |
| *Ind* | YES | YES | YES | YES |
| *R2* | 22.45% | 21.61% | 21.94% | 20.30% |
| *N* | 13098 | 13098 | 13098 | 13098 |
| *F-value* | 57.757*** | 45.358*** | 57.215*** | 43.466*** |

Note: The t-statistics in parentheses are calculated using robust standard errors clustered at firm-level. ***, ** and * indicate that the coefficient is significant at the 1%, 5% and 10% levels, respectively.
